# Supplementary material for: Pretreatment with Zonisamide Mitigates Oxaliplatin-Induced Toxicity in Rat DRG Neurons and DRG Neuron–Schwann Cell Co-Cultures
Source: MDPI journal article supplement (doi:10.3390/ijms23179983), 2022-09-01
Supplement: s1 [file s1]

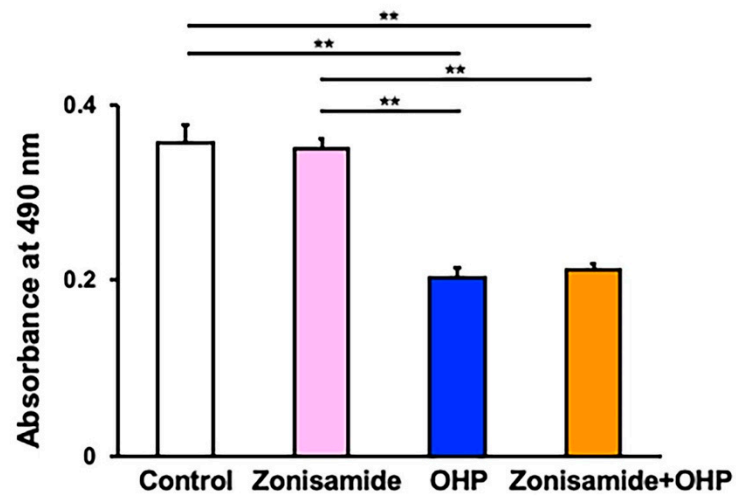

**Supplementary Figure S1.** Preincubation of zonisamide (100  $\mu$ M) for 6 h fails to mitigate the cell death caused as a result of exposure to OHP (75  $\mu$ M) for 24 h. Data are presented as the mean  $\pm$  *SD* of 6-9 experiments, respectively; \*\*:  $p < 0.01$  (as defined by Tukey-Kramer).
